# IL-1 $\alpha$ Mediated Chorioamnionitis Induces Depletion of FoxP3<sup>+</sup> Cells and Ileal Inflammation in the Ovine Fetal Gut

Tim G. A. M. Wolfs<sup>1,2</sup>, Suhas G. Kallapur<sup>2</sup>, Graeme R. Polglase<sup>3</sup>, J. Jane Pillow<sup>3</sup>, Ilias Nitsos<sup>3</sup>, John P. Newnham<sup>3</sup>, Claire A. Chougnet<sup>4</sup>, Elke Kroon<sup>1</sup>, Julia Spierings<sup>1</sup>, Coen H. M. P. Willems<sup>1</sup>, Alan H. Jobe<sup>2</sup>, Boris W. Kramer<sup>1\*</sup>

**1** Department of Pediatrics, School of Oncology and Developmental Biology (GROW), Maastricht University Medical Center (MUMC), Maastricht, The Netherlands, **2** Department of Neonatology, Cincinnati Children's Hospital Medical Center, University of Cincinnati School of Medicine, Cincinnati, Ohio, United States of America, **3** School of Women's and Infants Health, The University of Western Australia, Perth, Australia, **4** Division of Molecular Immunology, Department of Pediatrics, Cincinnati Children's Hospital Medical Center, University of Cincinnati School of Medicine, Cincinnati, Ohio, United States of America

## Abstract

**Background:** Endotoxin induced chorioamnionitis increases IL-1 and provokes an inflammatory response in the fetal ileum that interferes with intestinal maturation. In the present study, we tested in an ovine chorioamnionitis model whether IL-1 is a major cytokine driving the inflammatory response in the fetal ileum.

**Method:** Sheep bearing singleton fetuses received a single intraamniotic injection of recombinant ovine IL-1 $\alpha$  at 7, 3 or 1 d before caesarian delivery at 125 days gestational age (term = 150 days).

**Results:** 3 and 7 d after IL-1 $\alpha$  administration, intestinal mRNA levels for IL-4, IL-10, IFN- $\gamma$  and TNF- $\alpha$  were strongly elevated. Numbers of CD3<sup>+</sup> and CD4<sup>+</sup> T-lymphocytes and myeloperoxidase<sup>+</sup> cells were increased whereas FoxP3<sup>+</sup> T-cells were detected at low frequency. This increased proinflammatory state was associated with ileal mucosal barrier loss as demonstrated by decreased levels of the intestinal fatty acid binding protein and disruption of the tight junctional protein ZO-1.

**Conclusion:** Intraamniotic IL-1 $\alpha$  causes an acute detrimental inflammatory response in the ileum, suggesting that induction of IL-1 is a critical element in the pathophysiological effects of endotoxin induced chorioamnionitis. A disturbed balance between T-effector and FoxP3<sup>+</sup> cells may contribute to this process.

**Citation:** Wolfs TGAM, Kallapur SG, Polglase GR, Pillow JJ, Nitsos I, et al. (2011) IL-1 $\alpha$  Mediated Chorioamnionitis Induces Depletion of FoxP3<sup>+</sup> Cells and Ileal Inflammation in the Ovine Fetal Gut. PLoS ONE 6(3): e18355. doi:10.1371/journal.pone.0018355

**Editor:** Rory Morty, University of Giessen Lung Center, Germany

**Received:** December 24, 2010; **Accepted:** February 27, 2011; **Published:** March 29, 2011

**Copyright:** © 2011 Wolfs et al. This is an open-access article distributed under the terms of the Creative Commons Attribution License, which permits unrestricted use, distribution, and reproduction in any medium, provided the original author and source are credited.

**Funding:** This study was supported by the National Institutes of Health Grant HD-57869 (to S. Kallapur), the Dutch Scientific Research Organization Veni Grant 016.096.141 (to B.W. Kramer), the Ter Meulen Fund of the Royal Netherlands Academy of Arts and Sciences (to T.G.A.M. Wolfs) and the Research School for Oncology and Developmental Biology (GROW), Maastricht University. The funders had no role in study design, data collection and analysis, decision to publish, or preparation of the manuscript.

**Competing Interests:** The authors have declared that no competing interests exist.

\* E-mail: b.kramer@mumc.nl

## Introduction

Preterm delivery is the primary cause of neonatal morbidity and mortality and its incidence worldwide is increasing [1]. The most frequent association with preterm delivery is chorioamnionitis (a histological inflammation of the fetal membranes) [2]. Prenatal inflammation, commonly associated with chorioamnionitis and prematurity, is linked with adverse outcomes of the gut including poor nutritional uptake, subsequent postnatal growth restriction, necrotizing enterocolitis and late onset sepsis [3–8]. However, the mechanisms responsible for the association of antenatal inflammation, preterm birth and the increased incidence of intestinal disorders remain unknown.

Recently, we used a translational model of chorioamnionitis in fetal sheep to evaluate the effects of antenatal inflammation on intrauterine gut development. We showed that exposure of the preterm gut to

endotoxin disrupted maturation of the gut barrier and the innate immune defence [9]. Intestinal inflammation induced by intraamniotic LPS was preceded by increased proinflammatory cytokines with an inflammatory response in the chorioamnion and the lung [10,11]. From the early proinflammatory cytokines that are known to be produced after LPS induced chorioamnionitis, only intraamniotic injection of IL-1 mimics the lung and systemic effects of LPS [12–14]. Therefore, we hypothesized that IL-1 mediated chorioamnionitis would disrupt gut development.

We administered IL-1 $\alpha$  by intraamniotic injection prior to preterm delivery and evaluated the terminal ileum as the region of the gastrointestinal tract most vulnerable to injury and intestinal pathologies including NEC [15]. Fetal ileal inflammatory responses were evaluated with immunohistochemistry to measure myeloperoxidase (MPO), CD3 and CD4 expressing cells and the expression of FoxP3, a transcription factor required for the

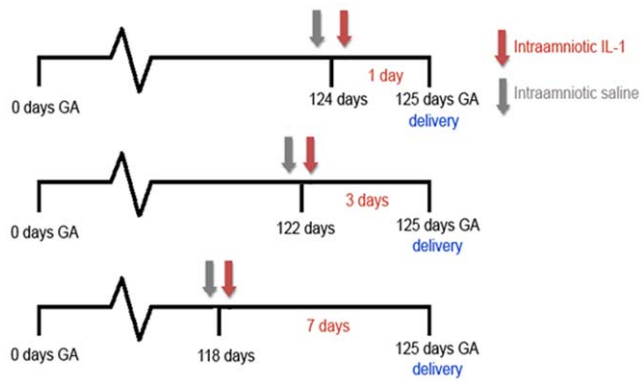

**Figure 1. Experimental design.** Antenatal inflammation was induced by a single injection of IL-1 $\alpha$  under ultrasound guidance at 118, 122 or 124 d GA. Animals were delivered at 125 d GA and animals of the control group underwent the same procedure with an injection of saline. doi:10.1371/journal.pone.0018355.g001

development and suppressive function of regulatory T-cells. Gut wall integrity was evaluated by the distribution of the tight junctional protein Zonula Occludens-1 (ZO-1) which plays a crucial role in paracellular barrier sealing. In addition, the amount of intestinal Fatty Acid Binding Protein (I-FABP) was analyzed in the gut as a marker for intestinal mucosal damage, since this small cytosolic protein is present in mature enterocytes of small and large intestines and released if the cell membrane integrity is compromised [16,17].

## Materials and Methods

### Animals

The animal work for this study was performed in Western Australia and approved by the Animal Ethics Committee of the University of Western Australian and the Children's Hospital Medical Center, Cincinnati, OH (Approval ID 8D05048). Date bred Merino ewes with singleton fetus were randomly assigned to groups of six or seven animals to receive a single dose of 100  $\mu$ g

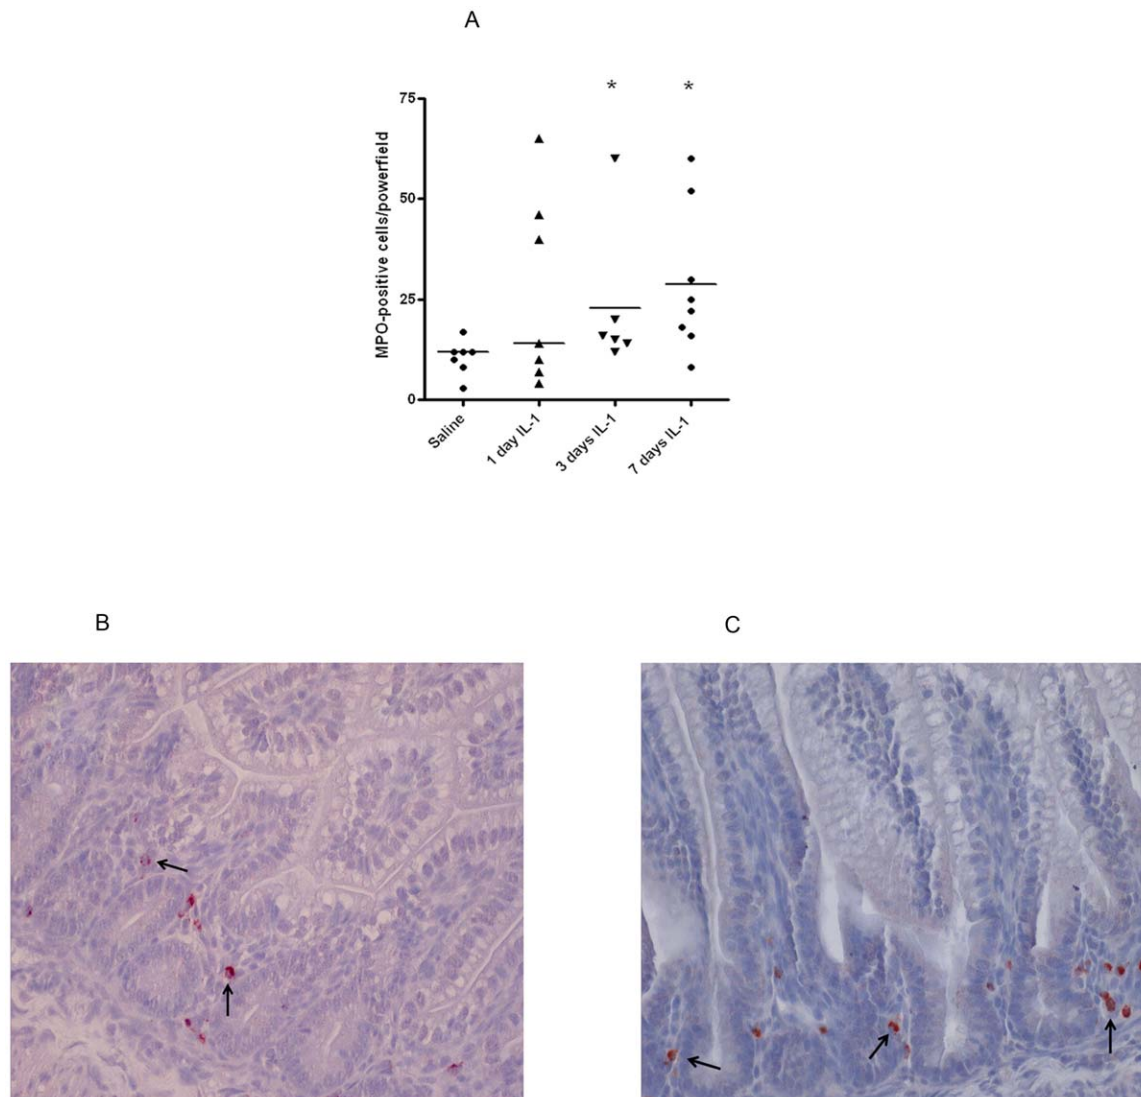

**Figure 2. Compared to control animals, a significant (\*) increase of MPO immunoreactivity in the fetal terminal ileum was seen at 3 d and 7 d after IL-1 $\alpha$  exposure.** For each experimental group, mean cell counts of MPO positive cells are given per high-power field (A). Representative sections of control animals and IL-1 treated animals for 3 d are depicted in B-C. doi:10.1371/journal.pone.0018355.g002

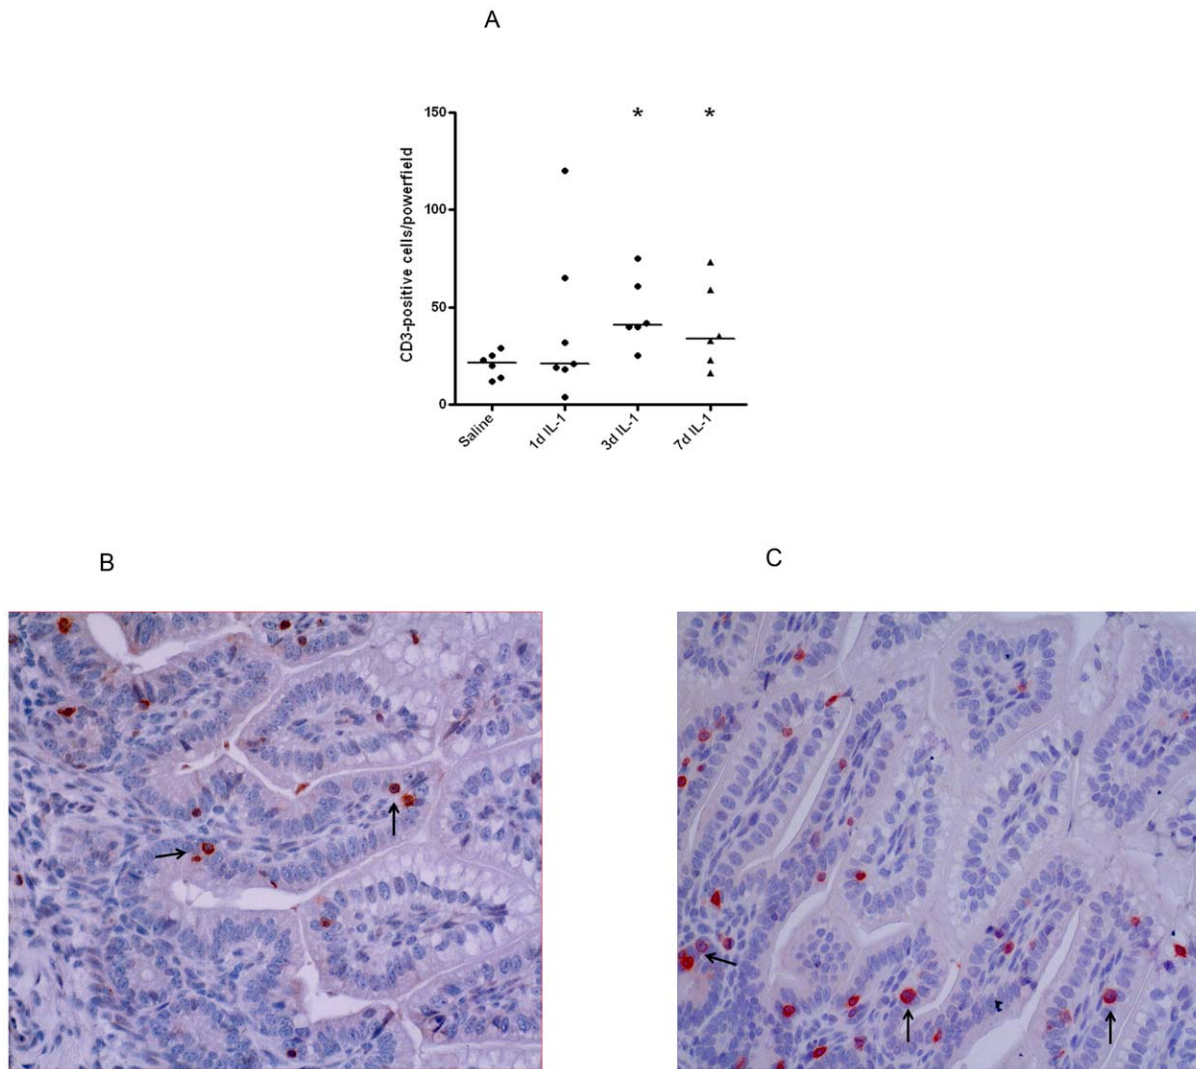

**Figure 3. At 3 d and 7 d after intraamniotic IL-1 $\alpha$  injection, significant increases of CD3 positive cells in the fetal terminal ileum were detected when compared with saline treated animals.** For each experimental group, mean cell counts of CD3 expressing cells per high-power field are depicted (A). Representative sections of saline and 3 d IL1 $\alpha$  treated animals are shown (B–C). doi:10.1371/journal.pone.0018355.g003

ovine recombinant IL-1 $\alpha$  (Protein Express, Cincinnati, OH) at 1 d, 3 d or 7 d before caesarian delivery at 125 d gestational age (GA) (Figure 1). Control animals received intraamniotic injections with saline under ultrasonic guidance at the same timepoints (Figure 1). The 125 d GA of the fetal lambs is comparable with a human GA of approximately 27 weeks.

The biological activity of IL-1 $\alpha$  was previously described in this model [10]. We recently described the pathological evidence of chorioamnionitis following intraamniotic IL-1 injection in this ovine model [18]. Briefly, 1–2 d following intra-amniotic injection of IL-1 alpha, inflammation in the chorioamnion was shown by histology and increased cytokine levels. In addition, increased recruitment of inflammatory cells and enhanced cytokine levels were detected in the amniotic fluid.

### Antibodies

The following antibodies were used: rabbit antibodies against human MPO and CD3 (Dakocytomation, Glostrup, Denmark), I-FABP (Hycultbiotech, Uden, the Netherlands) and Zonula Occludens protein 1 (ZO-1) (Invitrogen, San Francisco, CA);

monoclonal antibodies against bovine CD4 (VMRD, Pullman, WA), human FoxP3 (eBioscience, San Diego, CA) and beta-actin (Sigma, Chicago, IL). Secondary antibodies, biotin conjugated rabbit anti-mouse or swine anti-rabbit and Texas red conjugated goat anti-rabbit were purchased from Dakocytomation and peroxidase conjugated goat anti-rabbit from Jackson (West Grove, PA). The specificity of all antibodies used in this study was extensively tested including the different secondary antibodies in combination with the appropriate isotype matched controls.

### Immunohistochemistry

Terminal ileal tissue was immersed in 10% buffered formalin for 24 h at 4°C. The formalin fixed samples were embedded in paraffin and 3  $\mu$ m sections were cut. For detection of CD3 expressing cells, slides were boiled in 10 mM Na-citrate (pH 6.0) for 20 min. Endogenous peroxidase activity was blocked with 0.3% H<sub>2</sub>O<sub>2</sub> in methanol. Slides were blocked with either normal goat serum (MPO, FoxP3) or bovine serum albumin (CD3, CD4) for 30 min at room temperature. Slides were incubated with the primary antibody of interest for 1 h at room temperature (CD3,

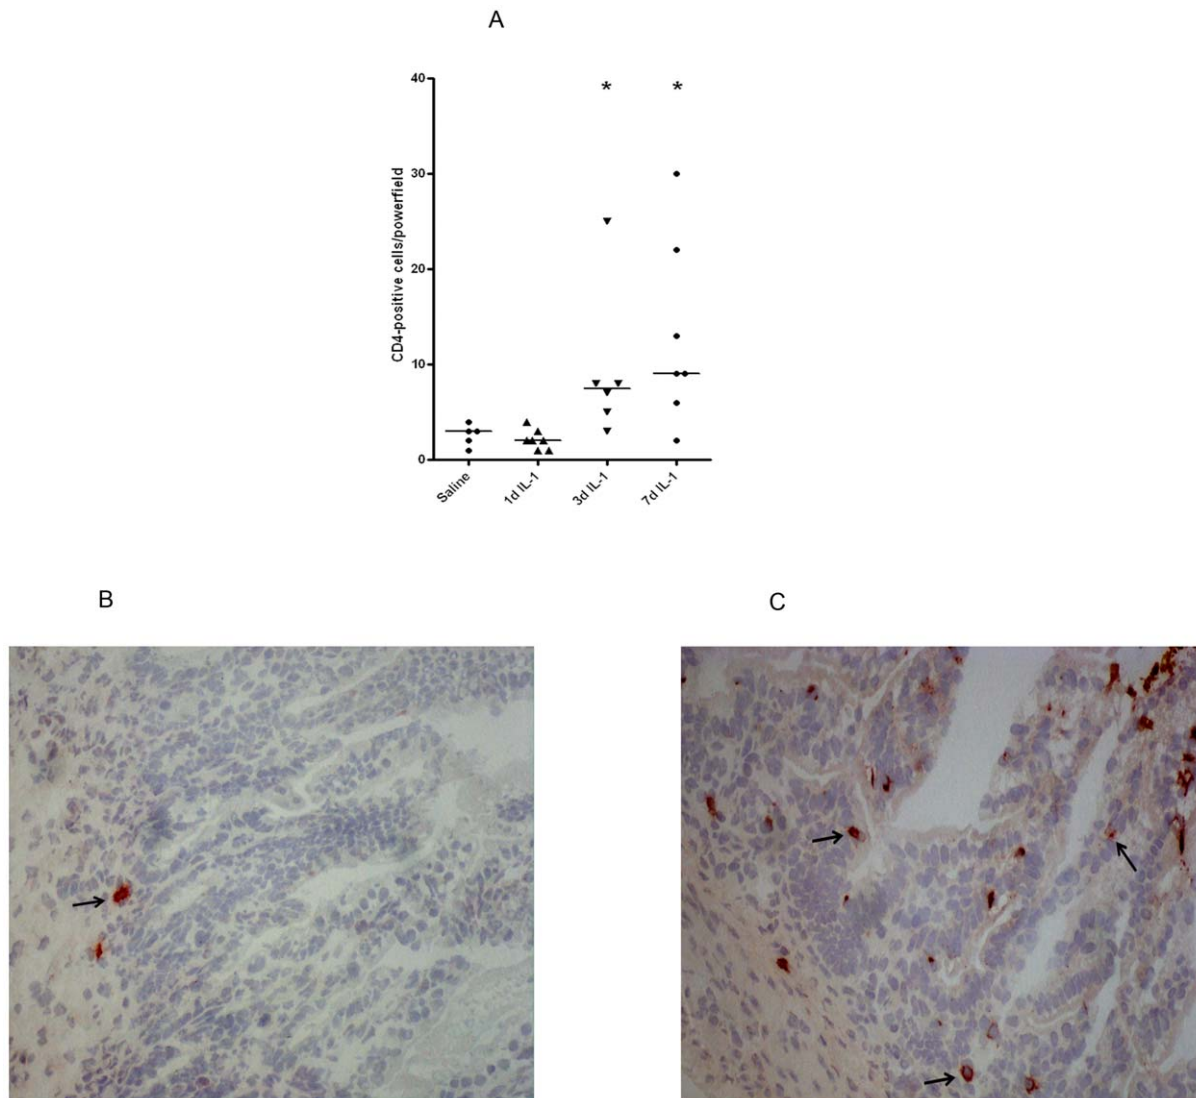

**Figure 4. At 3 d and 7 d after intraamniotic IL-1 $\alpha$  injection, the number of CD4 positive cells significantly increased when compared with saline treated animals.** A) For each experimental group, mean cell counts of CD4 expressing cells are expressed per high-power field. B–C) Representative sections of saline and 3 d IL-1 $\alpha$  treated animals are shown. doi:10.1371/journal.pone.0018355.g004

CD4 and MPO) or overnight at 4°C (FoxP3). After washing, sections were incubated with the appropriate secondary conjugated antibody. CD3 and FoxP3 antibodies were detected with the streptavidin-biotin system (Dakocytomation) and antibodies against MPO and CD4 were detected using a peroxidase conjugated secondary antibody. Positive staining for MPO, CD3 and CD4 was visualized with 3-amino-9-ethylcarbazole (AEC, Sigma); nuclei were counterstained with haematoxylin. Immunoreactivity for FoxP3 was visualized using nickel-DAB. The numbers of cells exhibiting immunostaining were counted as follows: for MPO, CD3 and CD4, the average number of 3 different high power fields at a 200 $\times$  magnification were given; for FoxP3, the sum of three high power fields (100 $\times$ ) was estimated. The immunohistochemical analysis was scored by 3 investigators who were blinded to the experimental conditions.

#### Immunofluorescence

Immunofluorescence was performed and interpreted as described earlier [9]. Briefly, frozen ileal sections (3  $\mu$ m) were

incubated with anti-ZO-1 and Texas Red conjugated goat anti rabbit antibody (Jackson, West Grove, PA) respectively, followed by a 2 min incubation with 4',6-diamino-2-phenyl indole (DAPI). The distribution of ZO-1 was recorded at a magnification of 200 $\times$  using the Metasystems Image Pro System (black and white charge-couple device camera; Metasystems, Sandhausen, Germany) mounted on a Leica DM-RE fluorescence microscope (Leica, Wetzlar, Germany).

#### Cytokine mRNA Quantitation

Total RNA was isolated from terminal ileal tissue by Trizol/chloroform extraction. mRNA quantitation was performed using real-time PCR. Total RNA was reverse transcribed using oligo(dT) primer and Moloney murine leukemia virus reverse transcriptase (Life Technologies) according to the supplier's recommendations. cDNA was used as a template with primers and Taqman probes (Applied Biosystems, Carlsbad CA) specific to sheep sequences. The values for each cytokine were normalized to the internal 18S rRNA value. Data were expressed as fold increase over the control value.

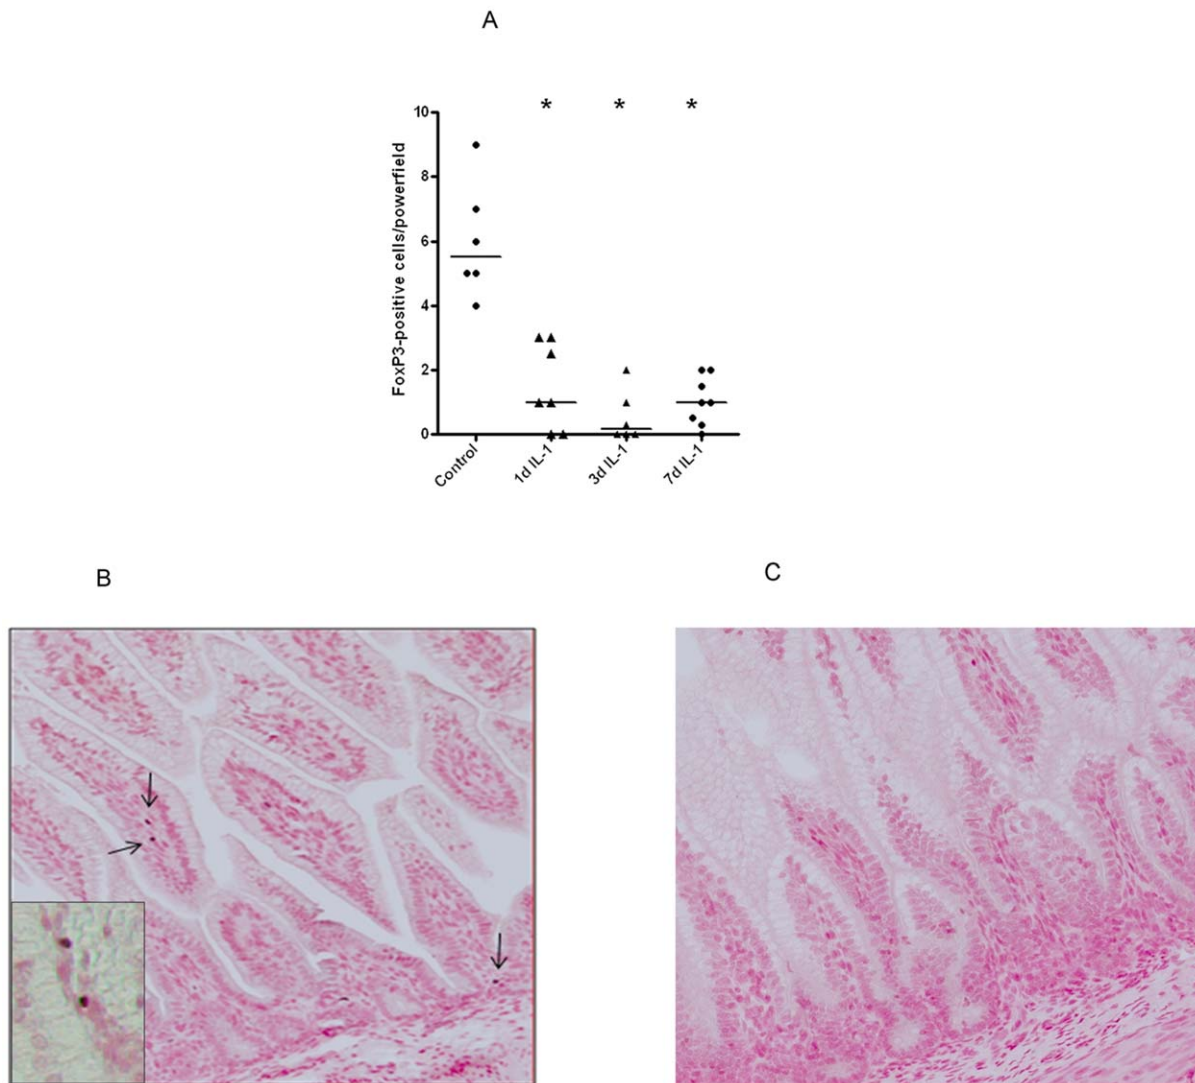

**Figure 5. A single intraamniotic injection of IL-1 $\alpha$  significantly reduced the number of FoxP3 expressing cells.** A) Mean cell counts of FoxP3+ positive cells were measured for the sum of 3 high-power fields. Representative ileal sections of saline (B) and 3 d IL-1 $\alpha$  (C) treated animals are shown. For inset, 400 $\times$  magnification was used.  
doi:10.1371/journal.pone.0018355.g005

### Western blotting

Protein sample Intestinal tissue samples were homogenized in lysis buffer (200 mM NaCl, 10 mM Tris base, 5 mM EDTA, 10% Glycerin, 1 mM PMSF, 0.1 U/mL Aprotinin and 1  $\mu$ g/mL Leupeptin). Homogenates were centrifuged at 300 rpm for 10 min; supernatants were collected and centrifuged again at 10 000 rpm for 3 min. Total protein concentrations in the final supernatants were determined using the bicinchoninic acid (BCA) protein assay (Pierce Rockford, IL). To confirm equal protein loading, immunoblotting was performed with an anti- $\beta$ -actin antibody. Aliquots with equal amounts of protein were heated at 100 $^{\circ}$ C for 5 min in SDS sample buffer, separated on 15% SDS-polyacrylamide gels and transferred to nitrocellulose (Schleicher&Schull, Dassel, Germany). After blocking, membranes were probed with the indicated antibodies, followed by an IRDye700-conjugated secondary antibody of the appropriate species (LI-COR, Lincoln, NE, USA). Protein bands were visualized using an Odyssey Infrared Imaging System (LI-COR).

### Statistical analysis

The number of cells exhibiting immunostaining for MPO, CD3 and FoxP3 were counted per high power field. Mann-Whitney U-tests were used for between-group comparisons. Statistical calculations were made using SPSS 15.0 for Windows (SPSS, Chicago, IL) and differences were considered statistically significant at  $p < 0.05$ .

## Results

### Inflammation in the fetal ileum

In preterm control animals, a small number of cells expressing MPO were detected. There was a variable increase in the number of infiltrating MPO positive cells after 1 d exposure to IL-1 $\alpha$  (Figure 2A). However, the number of MPO+ cells was significantly increased in animals exposed to IL-1 $\alpha$  for 3 d and 7 d when compared to control animals (Figure 2A). Representative sections of the control and 3 d groups are shown in Figure 2B–C.

The influx of CD3+ and CD4+ T-cells into the fetal ileum largely paralleled the influx of MPO+ cells. In preterm lambs

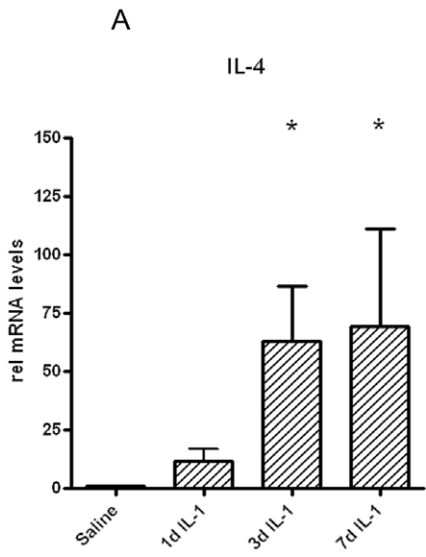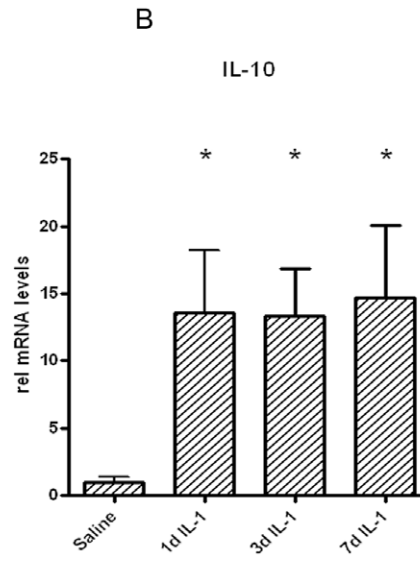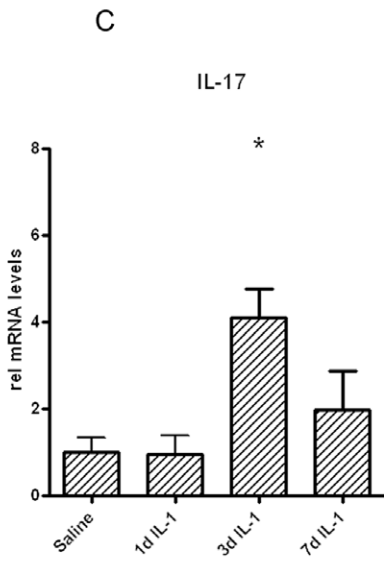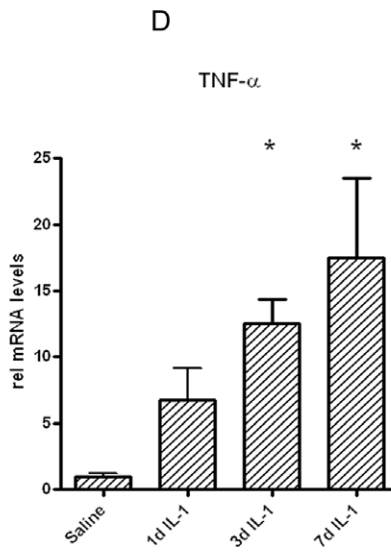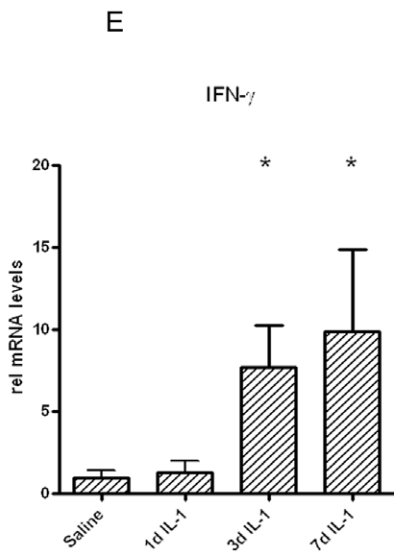

**Figure 6. Quantification using real-time PCR assays using sheep specific primers and Taqman probes.** The values for each cytokine were normalized to 18s rRNA. The mean mRNA signal in control animals was given the value of 1 and levels at each time point were expressed relative to controls (\* $p < 0.05$  vs control). doi:10.1371/journal.pone.0018355.g006

exposed to IL-1 $\alpha$  for 1 d, no significant increase of CD3 and CD4 expressing T-cells in the lamina propria was observed when compared with control tissue whereas increased numbers of CD3 and CD4 expressing cells were identified at 3 d and 7 d post IL-1 $\alpha$  treatment (Figure 3A and Figure 4A). Representative CD3 and CD4 stained ileal sections for the control and 3 d post IL-1 $\alpha$  groups are shown in Figures 3B–C and Figure 4B–C respectively.

Next, we identified the distribution of cells expressing the transcription factor FoxP3, the most commonly used marker for T-reg identification. When compared to control animals, FoxP3 positive cells decreased at 1 d, 3 d and 7 d after IL-1 $\alpha$  exposure with the lowest numbers in the 3 d group (Figure 5A). Representative ileal sections for the control and 3 d post IL-1 $\alpha$  groups are shown in Figures 5B–C.

Intraamniotic injection of IL-1 $\alpha$  strongly induced the mRNA expression of TNF- $\alpha$ , IFN- $\gamma$ , IL-4 and IL-10 whereas IL-17 was only moderately induced 3 d post IL-1 treatment (Figure 6).

### Ileal barrier

Next, we asked whether the barrier integrity of the ileum was altered by IL-1 $\alpha$ . To this end, we first analyzed intestinal levels of I-FABP, a small protein present in the cytoplasm of differentiated enterocytes. Compared to controls, intestinal I-FABP levels decreased within 1 d after IL-1 $\alpha$  exposure reaching statistical significance at 3 and 7 d post IL-1 $\alpha$  exposure (Figure 7).

We also stained for the tight junctional protein ZO-1, a 225 kDa membrane bound protein which binds the transmembrane tight junction proteins occludin and claudins and links them to cytoskeletal actin [19]. ZO-1 localization was disturbed in premature control animals (Figure 8A) and this localization pattern was not changed after 1 d of IL-1 $\alpha$  exposure (not shown). Fetuses exposed to IL-1 $\alpha$  for 3 d (Figure 8B) and 7 d (Figure 8C) had more fragmented ZO-1 when compared with control animals.

### Discussion

We recently showed that endotoxin induced chorioamnionitis provoked an inflammatory response in the preterm ileum that interfered with maturation of the fetal intestinal immune system and ileal barrier function [9].

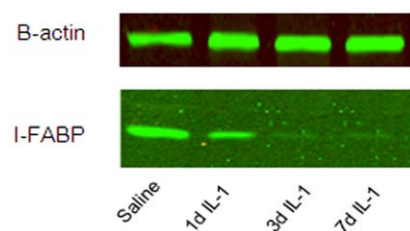

**Figure 7. The I-FABP content in the terminal ileum is reduced within 1 d after IL-1 $\alpha$  treatment and I-FABP levels remain low up to 7 d after intraamniotic IL-1 $\alpha$  administration.** A) Representative b-actin and I-FABP protein fragments are shown for each group. B-actin was used to confirm equal loading. Relative quantitative data were obtained by densitometric evaluation of actin and I-FABP products which were compared to a standard curve obtained by amplification of a serial dilution of a highly concentrated protein standard (\* $p < 0.05$  vs control). doi:10.1371/journal.pone.0018355.g007

In the present study, we demonstrate that these harmful effects of intraamniotic endotoxin can be largely recapitulated by intraamniotic IL-1 $\alpha$ , as indicated by the strong increase of inflammatory cytokines and concomitant barrier loss following IA IL-1 $\alpha$  delivery. However, the influx of lymphocytes after intraamniotic LPS injection was more robust when compared to the effects of intraamniotic IL-1 injection. Therefore, this study demonstrates that induction of IL-1 is an important but not the only pathway, involved in fetal ileal inflammation and concomitant ileal barrier loss in the course of chorioamnionitis.

These results may have clinical relevance since IL-1 $\alpha$  and IL-1 $\beta$  increase in the amniotic fluid during clinical chorioamnionitis and in patients with premature rupture of membranes [20–23]. Moreover, loss of the ileal barrier in utero such as seen in our translational model following IL-1 driven intestinal inflammation might explain the association between chorioamnionitis and the increased risk for adverse outcomes of the gut, since gut barrier loss is not only associated with poor nutrition and subsequent postnatal growth restriction, but also contributes to intestinal pathologies after preterm birth including necrotizing enterocolitis [24].

The harmful pro-inflammatory status of the ileum after intraamniotic IL-1 $\alpha$  delivery could result from the decrease of FoxP3+ cells. This transcription factor is essential for the function of T-reg cells, which suppress T-effector cells. Although FoxP3 is the most commonly used marker for T-reg cells, its expression is upregulated in recently activated non T-reg cells in humans [25–27]. Therefore, we cannot rule out the possibility that FoxP3 is present in non-regulatory T-cells in our ovine model. However, since FoxP3 is decreased concomitant with the increased T-cell activation markers, this latter option seems less likely.

FoxP3+ cells decreased within 24 h after IL-1 exposure and this occurred prior to the increased influx of MPO+ cells and effector T-cells. It is tempting to speculate that loss of the inhibitory functions of T-reg cells on effector T-cells disturbs intestinal lymphoid and mucosal homeostasis, resulting in excessive immune activation and tissue damage. Alternatively, the early loss of T-reg could result in uncontrolled dendritic cell activation, which would lead to effector T-cell influx and activation. Whatever the exact target of T-reg is, such a mechanism would be consistent with earlier animal experiments and findings in humans which demonstrate that T-reg cells are critical for maintenance of intestinal tolerance to luminal antigens and for prevention of intestinal inflammation [28–30].

The observed depletion of FoxP3+ cells, presumed to be T-regs in fetal sheep, could be mediated by different mechanisms. These reduced numbers could be caused by increased death or decreased proliferation of regulatory T-cells [31]. On the other hand, T-reg cells could lose Foxp3 expression under inflammatory conditions. For instance, IL-4 can inhibit the generation of T-reg cells [32,33]. Since depletion of T-reg preceded induction of IL-4 mRNA levels, one might argue that IL-4 is not responsible for this initial loss of Foxp3 expressing cells, rather it could be involved in maintenance of low T-reg numbers. Alternatively, IL-6 has been reported to induce conversion of T-reg cells to Th17 cells, thereby downregulating the expression of FoxP3 [34,35]. However, this latter option does not seem likely since IL-17 mRNA levels are only marginally increased after intraamniotic IL-1 delivery. Another possibility is that impaired

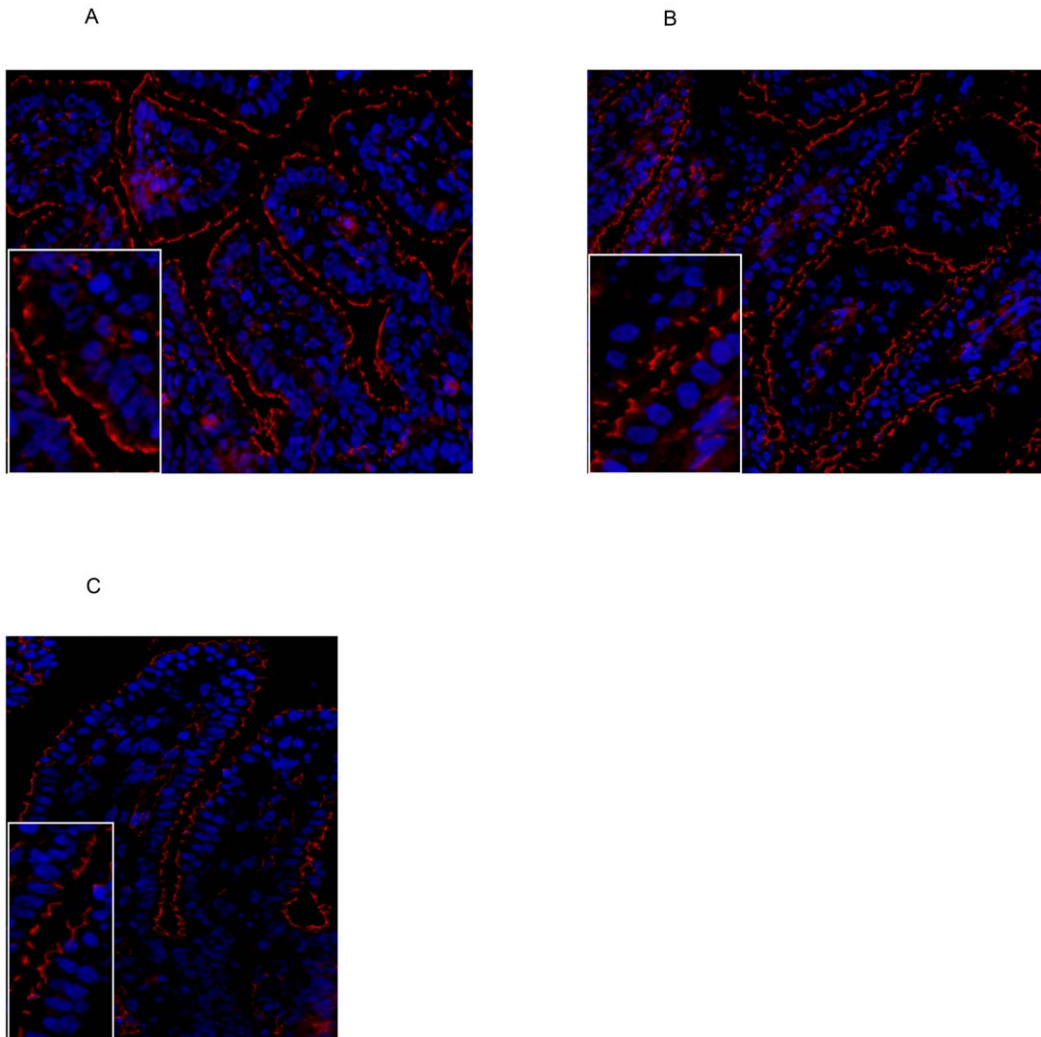

**Figure 8. The fragmented ZO-1 distribution in preterm control animals (A) was further disrupted in lambs exposed to IL-1 $\alpha$  for 3 d (B) or 7 d (C).** Magnification 200 $\times$ . For inset, 1000 $\times$  magnification was used.  
doi:10.1371/journal.pone.0018355.g008

b-catenin signaling in intestinal DCs might be responsible for the observed loss of T-reg cells, since this signaling pathway was recently been shown to be required for regulation and induction of T-reg cells in the gut [36].

To our knowledge, this is the first report of (regulatory) T-cells in the preterm fetal ileum. Moreover, postnatal findings are limited. Weitkamp et al. provided data concerning postnatal developmental regulation of T-reg cells in relationship to other T cells in intestinal samples of preterm infants with and without NEC [37]. In line with our in utero findings, T-regs decreased during intestinal inflammation, but in contrast with our data, T-effector cells were decreased in the inflamed gut when compared to the healthy premature intestine [37]. This discrepancy could have multiple explanations such as the exposure of the gut to an antigen load following birth. Our model is unique as a single agonist is inducing the multiple responses in a naïve preterm fetal gut.

Interestingly, concomitant with the influx of MPO+ cells and CD3+/CD4+ effector cells, a strong induction of IL-10 was observed. Although this cytokine is critical for preservation of gut integrity as shown in IL-10 deficient mice [38], our results suggest

that maintenance of FoxP3+ cells may be more critical than IL-10 induction.

Taken together, the important conclusion from the present study is that IL-1 signaling in the amniotic compartment can recapitulate pathogenesis of chorioamnionitis-induced inflammation of the ileum, and potentially its adverse outcomes. Furthermore, suggestive evidence is provided that a disturbed balance between effector T-cells and FoxP3+ cells plays a role in ileal inflammation and subsequent mucosal damage in utero following chorioamnionitis.

### Acknowledgments

The authors thank Leon Janssen for excellent technical assistance.

### Author Contributions

Conceived and designed the experiments: TGAMW SGK JPN AHJ BWK. Performed the experiments: TGAMW GRP JJP IN JPN EK JS CHMPW AHJ BWK. Analyzed the data: TGAMW SGK CAC AHJ BWK. Wrote the paper: TGAMW SGK JJP CAC AHJ BWK.



## References

- Challis JR, Lye SJ, Gibb W, Whittle W, Patel F, et al. (2001) Understanding preterm labor. *Ann N Y Acad Sci* 943: 225–34.
- Goldenberg RL, Hauth JC, Andrews WW (2000) Intrauterine infection and preterm delivery. *N Engl J Med* 342: 1500–7.
- Andrews WW, Goldenberg RL, Faye-Petersen O, Cliver S, Goepfert AR, et al. (2006) The Alabama Preterm Birth study: polymorphonuclear and mononuclear cell placental infiltrations, other markers of inflammation, and outcomes in 23- to 32-week preterm newborn infants. *Am J Obstet Gynecol* 195: 803–8.
- Lin PW, Stoll BJ (2006) Necrotizing enterocolitis. *Lancet* 368: 1271–83.
- Sangild PT, Siggers RH, Schmidt M, Elnif J, Bjornvad CR, et al. (2006) Diet and colonization-dependent intestinal dysfunction predisposes to necrotizing enterocolitis in preterm pigs. *Gastroenterology* 130: 1776–92.
- Graham PL, 3rd, Begg MD, Larson E, Della-Latta P, Allen A, et al. (2006) Risk factors for late onset gram-negative sepsis in low birth weight infants hospitalized in the neonatal intensive care unit. *Pediatr Infect Dis J* 25: 113–7.
- Kramer BW (2008) Antenatal inflammation and lung injury: prenatal origin of neonatal disease. *J Perinatol* 28 Suppl 1: S21–7.
- Gantert M, Been JV, Gavilanes AW, Garnier Y, Zimmermann LJ, et al. (2010) Chorioamnionitis: a multiorgan disease of the fetus? *J Perinatol* 30 Suppl: S21–30.
- Wolfš TG, Buurman WA, Zoer B, Moonen RM, Derikx JP, et al. (2009) Endotoxin induced chorioamnionitis prevents intestinal development during gestation in fetal sheep. *PLoS One* 4: e5837.
- Willet KE, Kramer BW, Kallapur SG, Ikegami M, Newnham JP, et al. (2002) Intra-amniotic injection of IL-1 induces inflammation and maturation in fetal sheep lung. *Am J Physiol Lung Cell Mol Physiol* 282: L411–20.
- Sosenko IR, Kallapur SG, Nitsos I, Moss TJ, Newnham JP, et al. (2006) IL-1 alpha causes lung inflammation and maturation by direct effects on preterm fetal lamb lungs. *Pediatr Res* 60: 294–8.
- Ikegami M, Moss TJ, Kallapur SG, Mulrooney N, Kramer BW, et al. (2003) Minimal lung and systemic responses to TNF-alpha in preterm sheep. *Am J Physiol Lung Cell Mol Physiol* 285: L121–9.
- Kramer BW, Moss TJ, Willet KE, Newnham JP, Sly PD, et al. (2001) Dose and time response after intraamniotic endotoxin in preterm lambs. *Am J Respir Crit Care Med* 164: 982–8.
- Kallapur SG, Nitsos I, Moss TJ, Polglase GR, Pillow JJ, et al. (2009) IL-1 mediates pulmonary and systemic inflammatory responses to chorioamnionitis induced by lipopolysaccharide. *Am J Respir Crit Care Med* 179: 955–61.
- Caplan MS, Simon D, Jilling T (2005) The role of PAF, TLR, and the inflammatory response in neonatal necrotizing enterocolitis. *Semin Pediatr Surg* 14: 145–51.
- Pelsters MM, Hermens WT, Glatz JF (2005) Fatty acid-binding proteins as plasma markers of tissue injury. *Clin Chim Acta* 352: 15–35.
- Derikx JP, Vreugdenhil AC, Van den Neucker AM, Grootjans J, van Bijnen AA, et al. (2009) A pilot study on the noninvasive evaluation of intestinal damage in celiac disease using I-FABP and L-FABP. *J Clin Gastroenterol* 43: 727–33.
- Berry CA, Nitsos I, Hillman NH, Pillow JJ, Polglase GR, et al. (2011) IL-1 in lipopolysaccharide induced chorioamnionitis in the fetal sheep. *Reproductive Sciences*; In press.
- Fanning AS, Jameson BJ, Jesaitis LA, Anderson JM (1998) The tight junction protein ZO-1 establishes a link between the transmembrane protein occludin and the actin cytoskeleton. *J Biol Chem* 273: 29745–53.
- Baud O, Emilie D, Pelletier E, Lacaze-Masmontel T, Zupan V, et al. (1999) Amniotic fluid concentrations of interleukin-1beta, interleukin-6 and TNF-alpha in chorioamnionitis before 32 weeks of gestation: histological associations and neonatal outcome. *Br J Obstet Gynaecol* 106: 72–7.
- Baergen R, Benirschke K, Ulich TR (1994) Cytokine expression in the placenta. The role of interleukin 1 and interleukin 1 receptor antagonist expression in chorioamnionitis and parturition. *Arch Pathol Lab Med* 118: 52–5.
- Arntzen KJ, Kjollesdal AM, Halgunset J, Vatten L, Austgulen R (1998) TNF, IL-1, IL-6, IL-8 and soluble TNF receptors in relation to chorioamnionitis and premature labor. *J Perinat Med* 26: 17–26.
- Romero R, Mazor M, Brandt F, Sepulveda W, Avila C, et al. (1992) Interleukin-1 alpha and interleukin-1 beta in preterm and term human parturition. *Am J Reprod Immunol* 27: 117–23.
- Anand RJ, Leapart CL, Mollen KP, Hackam DJ (2007) The role of the intestinal barrier in the pathogenesis of necrotizing enterocolitis. *Shock* 27: 124–33.
- Walker MR, Kasprovicz DJ, Gersuk VH, Benard A, Van Landeghen M, Buckner JH, et al. (2003) Induction of FoxP3 and acquisition of T regulatory activity by stimulated human CD4+CD25- T cells. *J Clin Invest* 112: 1437–43.
- Tran DQ, Ramsey H, Shevach EM (2007) Induction of FOXP3 expression in naive human CD4+FOXP3 T cells by T-cell receptor stimulation is transforming growth factor-beta dependent but does not confer a regulatory phenotype. *Blood* 110: 2983–90.
- Presicce P, Moreno-Fernandez ME, Lages CS, Orsbom KI, Choungnet CA (2010) Association of two clones allows for optimal detection of human FOXP3. *Cytometry A* 77: 571–9.
- Westendorf AM, Templin M, Geffers R, Deppenmeier S, Gruber AD, et al. (2005) CD4+ T cell mediated intestinal immunity: chronic inflammation versus immune regulation. *Gut* 54: 60–9.
- Makita S, Kanai T, Nemoto Y, Totsuka T, Okamoto R, et al. (2007) Intestinal lamina propria retaining CD4+CD25+ regulatory T cells is a suppressive site of intestinal inflammation. *J Immunol* 178: 4937–46.
- Wildin RS, Smyk-Pearson S, Filipovich AH (2002) Clinical and molecular features of the immunodysregulation, polyendocrinopathy, enteropathy, X linked (IPEX) syndrome. *J Med Genet* 39: 537–45.
- Sakaguchi S, Ono M, Setoguchi R, Yagi H, Hori S, et al. (2006) Foxp3+ CD25+ CD4+ natural regulatory T cells in dominant self-tolerance and autoimmune disease. *Immunol Rev* 212: 8–27.
- Dardalhon V, Awasthi A, Kwon H, Galileos G, Gao W, et al. (2008) IL-4 inhibits TGF-beta-induced Foxp3+ T cells and, together with TGF-beta, generates IL-9+ IL-10+ Foxp3(-) effector T cells. *Nat Immunol* 9: 1347–55.
- Wang J, Han WG, Foks AC, Huizinga TW, Toes RE (2010) Neutralization of IL-4 reverses the nonresponsiveness of CD4+ T cells to regulatory T-cell induction in non-responder mouse strains. *Mol Immunol* 48: 137–46.
- Veldhoen M, Hocking RJ, Atkins CJ, Locksley RM, Stockinger B (2006) TGFbeta in the context of an inflammatory cytokine milieu supports de novo differentiation of IL-17-producing T cells. *Immunity* 24: 179–89.
- Bettelli E, Carrier Y, Gao W, Korn T, Strom TB, et al. (2006) Reciprocal developmental pathways for the generation of pathogenic effector TH17 and regulatory T cells. *Nature* 441: 235–8.
- Manicassamy S, Reizis B, Ravindran R, Nakaya H, Salazar-Gonzalez RM, et al. (2010) Activation of beta-catenin in dendritic cells regulates immunity versus tolerance in the intestine. *Science* 329: 849–53.
- Weitkamp JH, Rudzinski E, Koyama T, Correa H, Matta P, et al. (2009) Ontogeny of FOXP3(+) regulatory T cells in the postnatal human small intestinal and large intestinal lamina propria. *Pediatr Dev Pathol* 12: 443–9.
- Kuhn R, Lohler J, Rennick D, Rajewsky K, Muller W (1993) Interleukin-10-deficient mice develop chronic enterocolitis. *Cell* 75: 263–74.
